# Supplementary material for: Catalyst-free [4 + 2] cyclization of para-quinone methide derivatives with homophthalic anhydrides
Source: Royal Society of Chemistry journal article supplement (doi:10.1039/c8ob02776e), 2018-01-01
Supplement: c8ob02776e1.pdf [file c8ob02776e1.pdf]

## ***Supporting Information***

### **Catalyst-Free [4+2] Cyclization of *para*-Quinone Methide Derivatives with Homophthalic Anhydrides**

Jia-Yu Zhou,<sup>a</sup> Chun Ma,<sup>a</sup> Yi-Zhu Zhang,<sup>a</sup> Qiong Wu<sup>\*b</sup> and Feng Shi<sup>\*a</sup>

*School of Chemistry and Materials Science, Jiangsu Normal University, Xuzhou, 221116, China.*

*E-mail: [fshi@jsnu.edu.cn](mailto:fshi@jsnu.edu.cn).*

*School of Chemistry and Chemical Engineering, Xuzhou University of Technology, Xuzhou*

*221018, China. E-mail: [hgwuqiong@xzit.edu.cn](mailto:hgwuqiong@xzit.edu.cn).*

#### **Contents:**

**1. NMR spectra of products 3 and 4 (S1-S18)**

**2. X-ray single crystal data for compound 3da (S19-S20)**

## 1. NMR spectra of products 3

$^1\text{H}$  NMR of compound **3aa** (inseparable diastereomers with 91:9 dr)

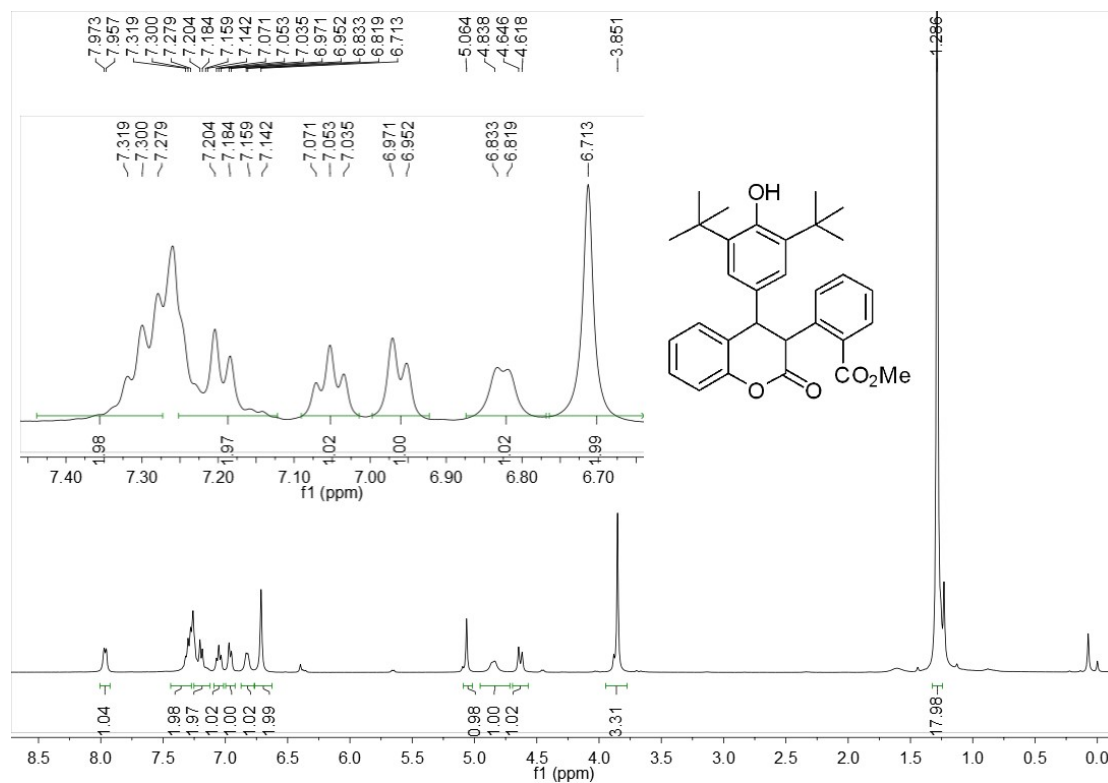

$^{13}\text{C}$  NMR of compound **3aa** (inseparable diastereomers with 91:9 dr)

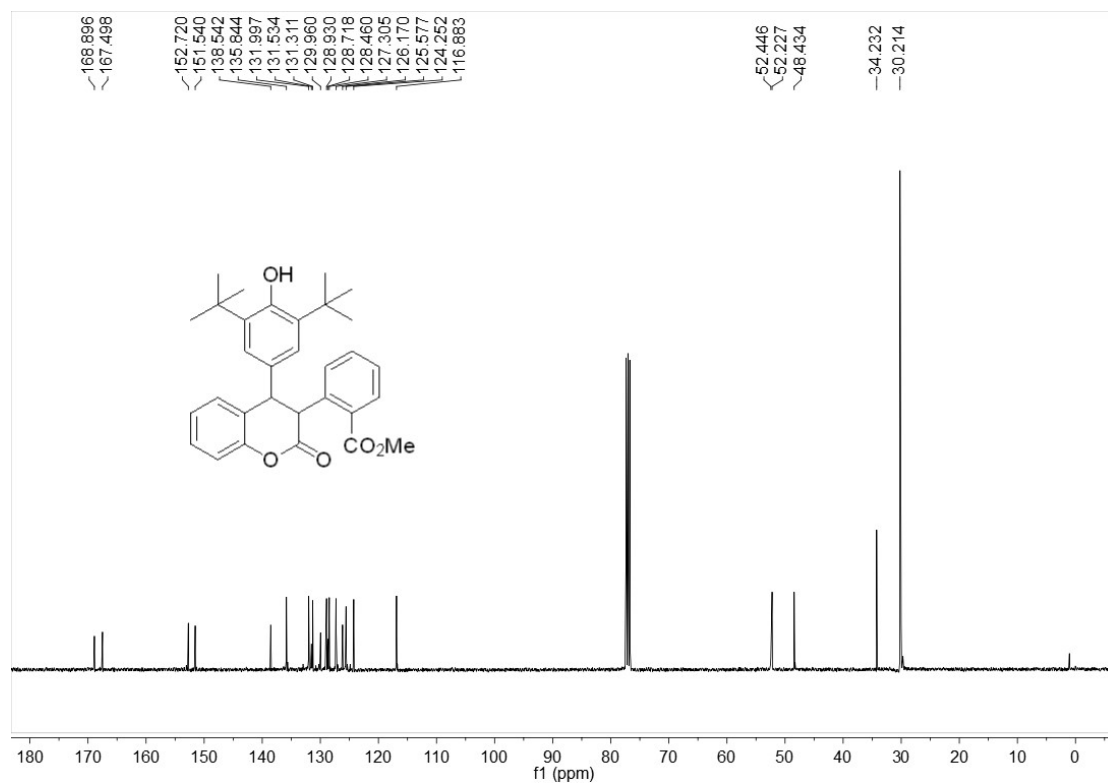

$^1\text{H}$  NMR of compound **3ba** (inseparable diastereomers with 85:15 dr)

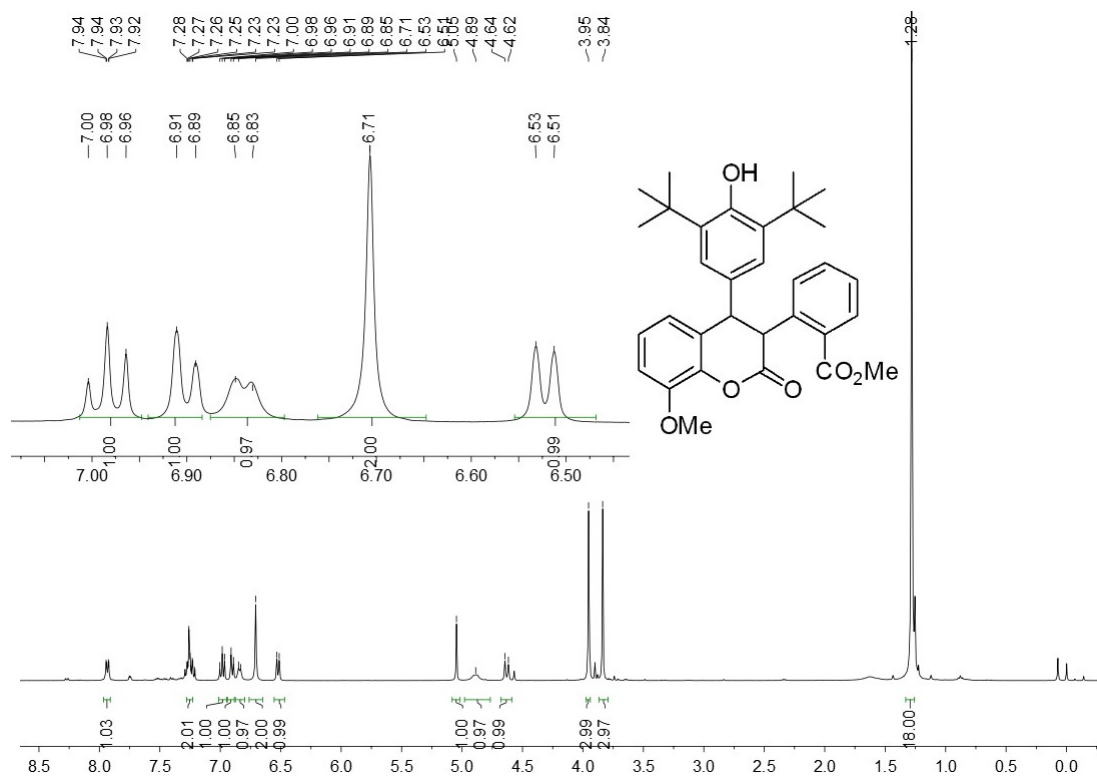

$^{13}\text{C}$  NMR of compound **3ba** (inseparable diastereomers with 85:15 dr)

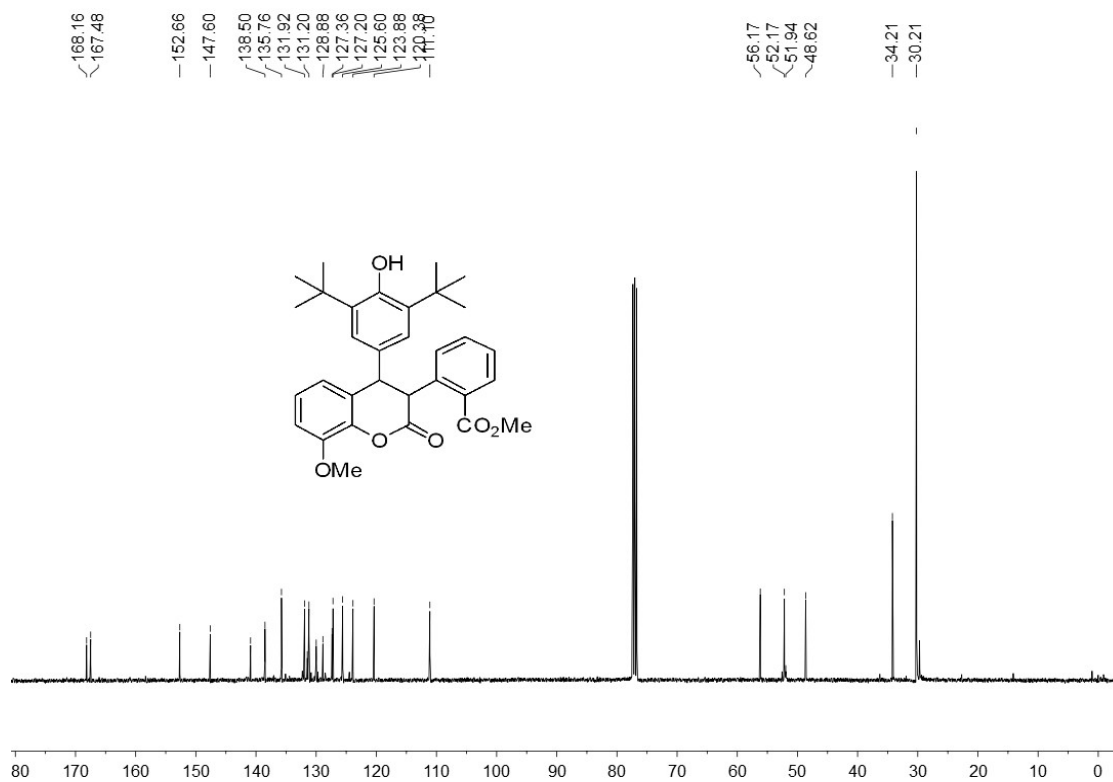

$^1\text{H}$  NMR of compound **3ca** (inseparable diastereomers with 80:20 dr)

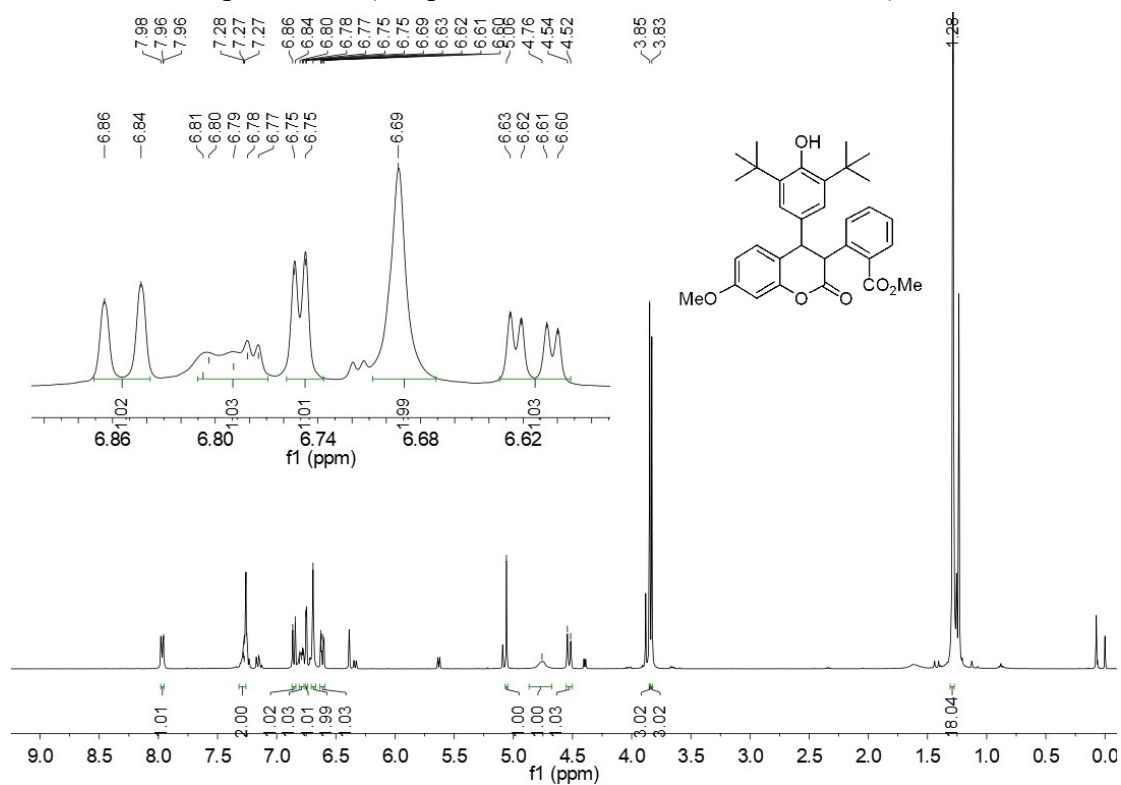

$^{13}\text{C}$  NMR of compound **3ca** (inseparable diastereomers with 80:20 dr)

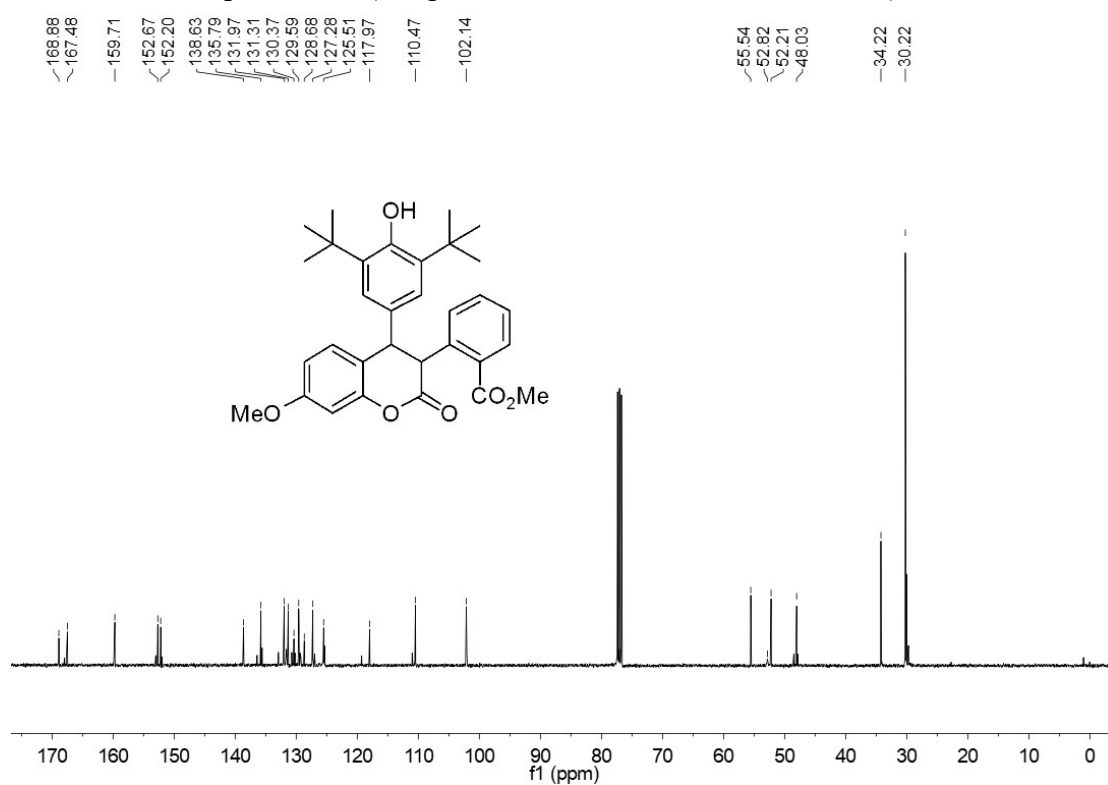

$^1\text{H}$  NMR of compound **3da** (inseparable diastereomers with 91:9 dr)

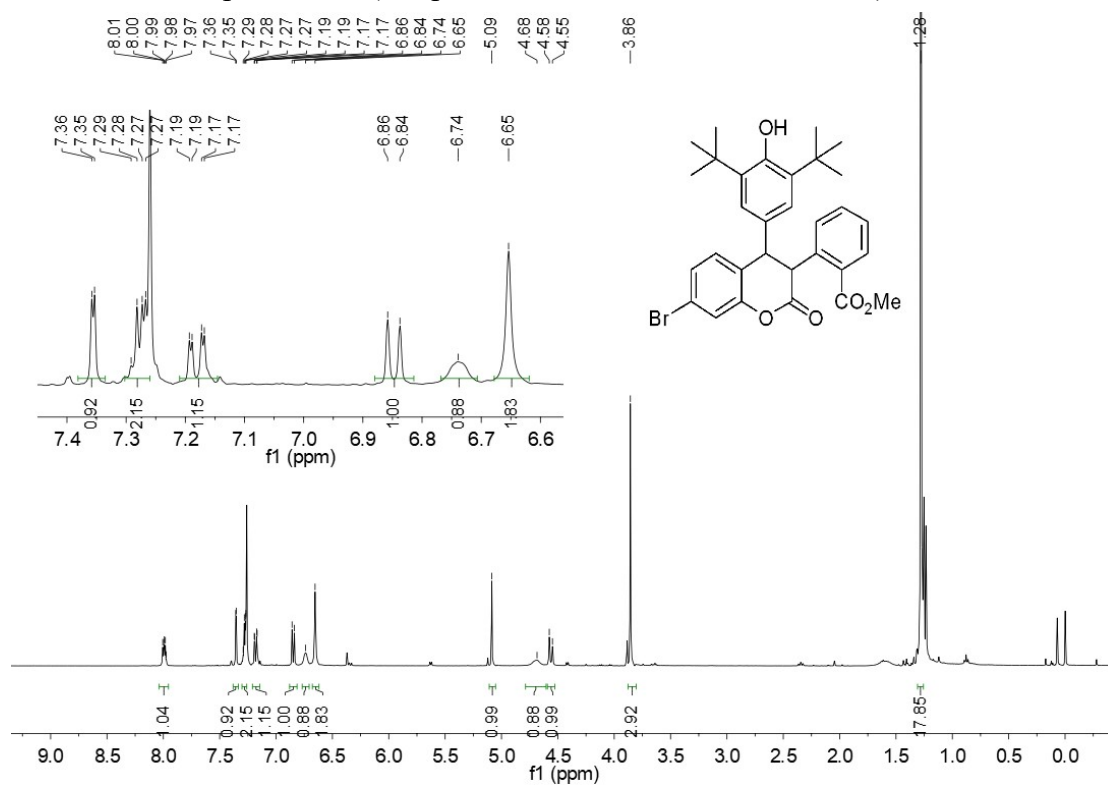

$^{13}\text{C}$  NMR of compound **3da** (inseparable diastereomers with 91:9 dr)

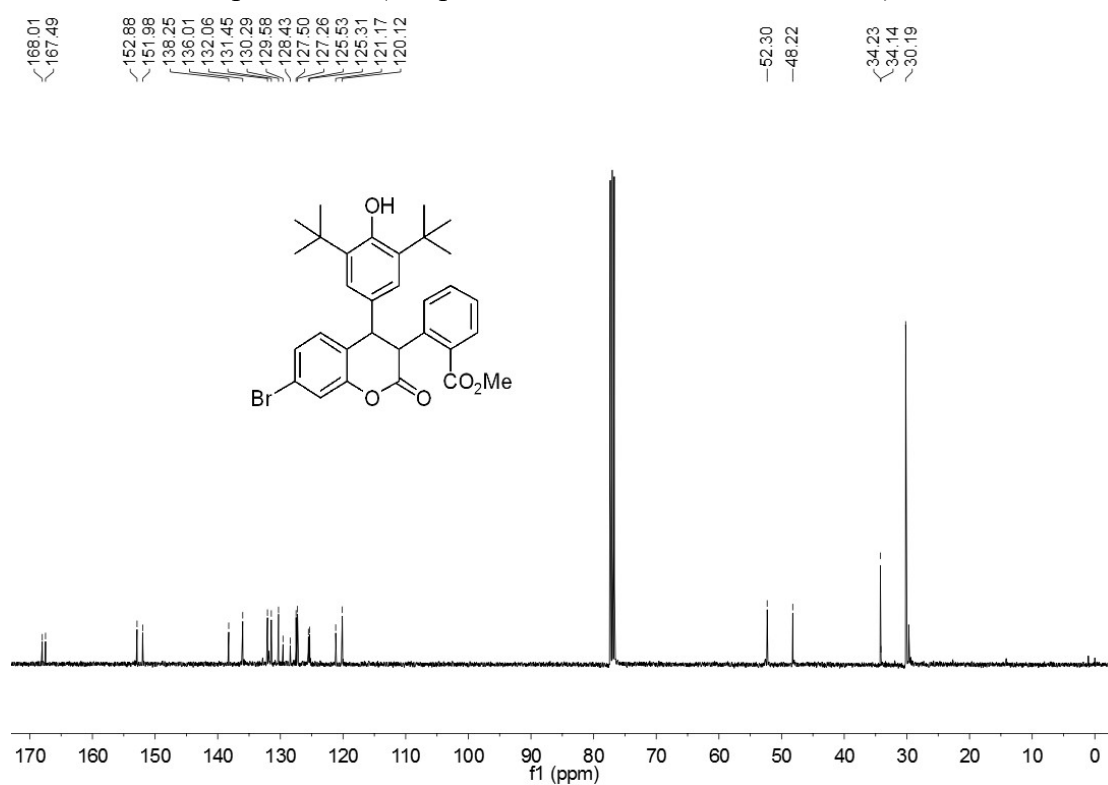

$^1\text{H}$  NMR of compound **3ea** (inseparable diastereomers with 91:9 dr)

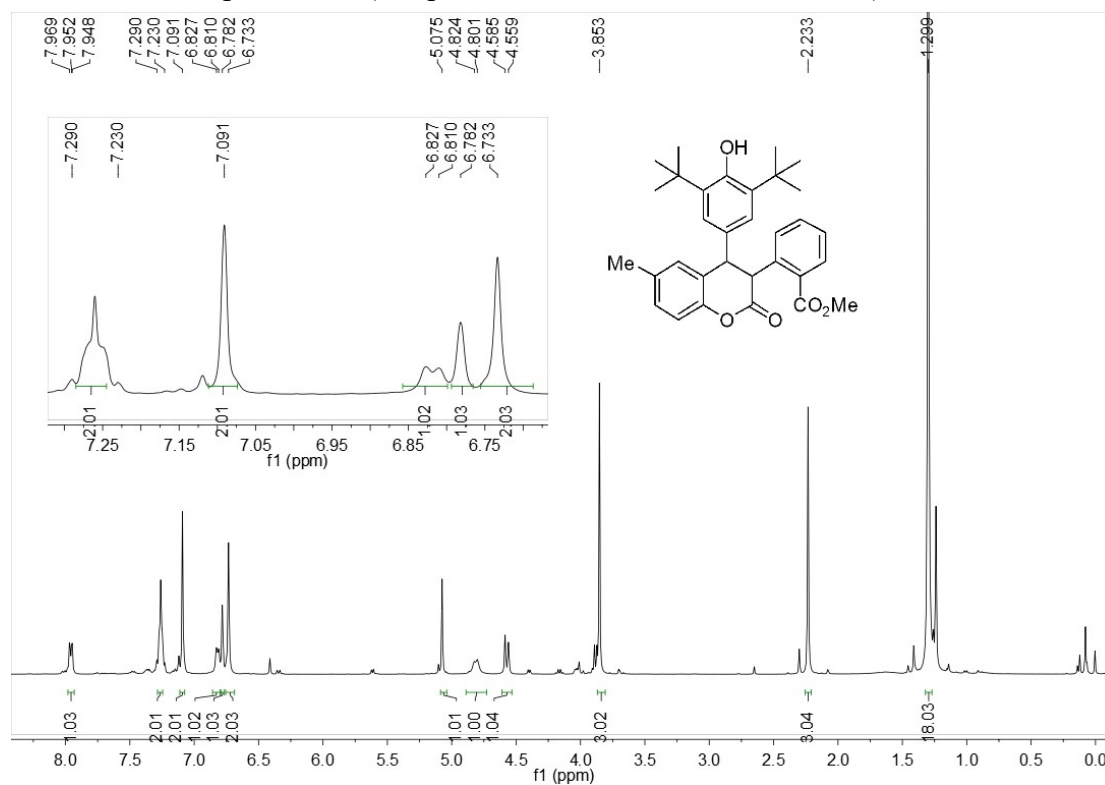

$^{13}\text{C}$  NMR of compound **3ea** (inseparable diastereomers with 91:9 dr)

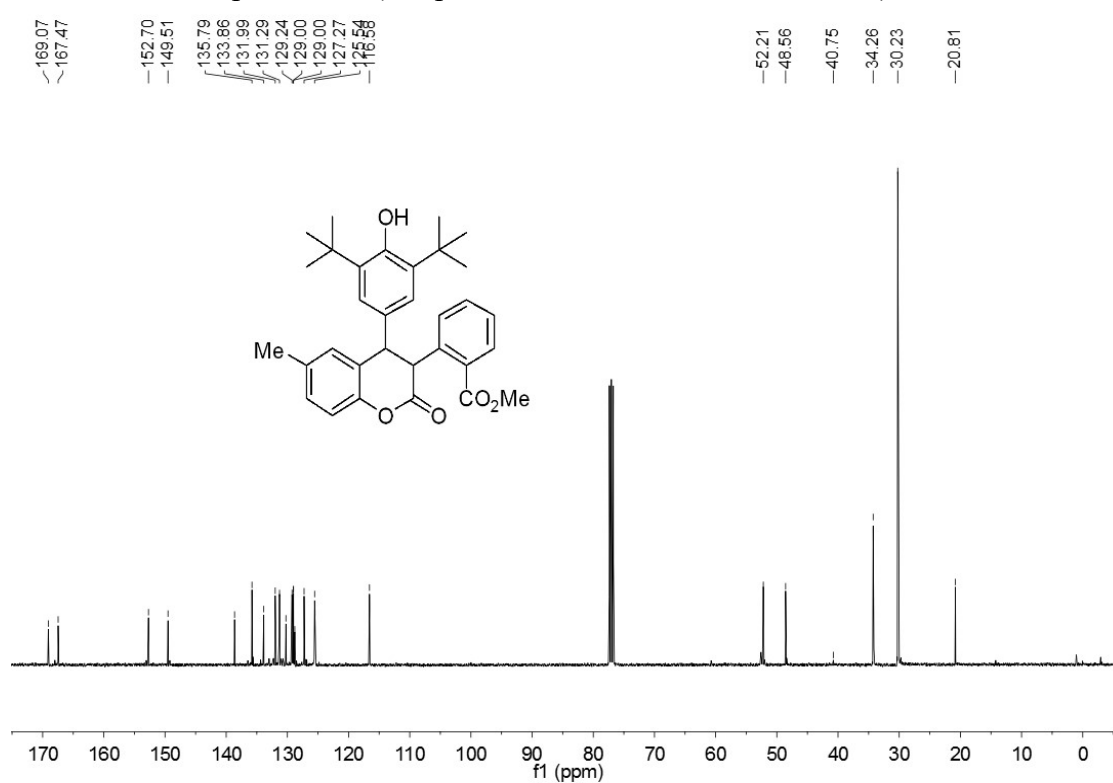

$^1\text{H}$  NMR of compound **3fa** (inseparable diastereomers with 91:9 dr)

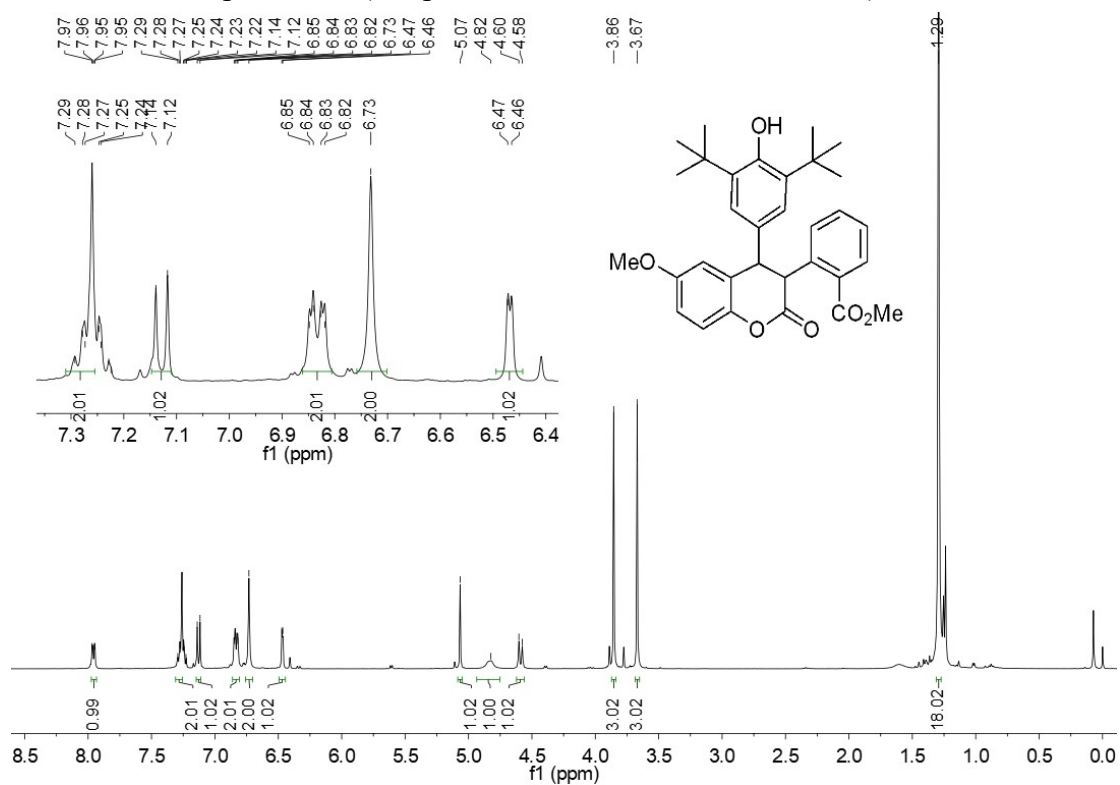

$^{13}\text{C}$  NMR spectrum of compound **3fa** (inseparable diastereomers with 91:9 dr)

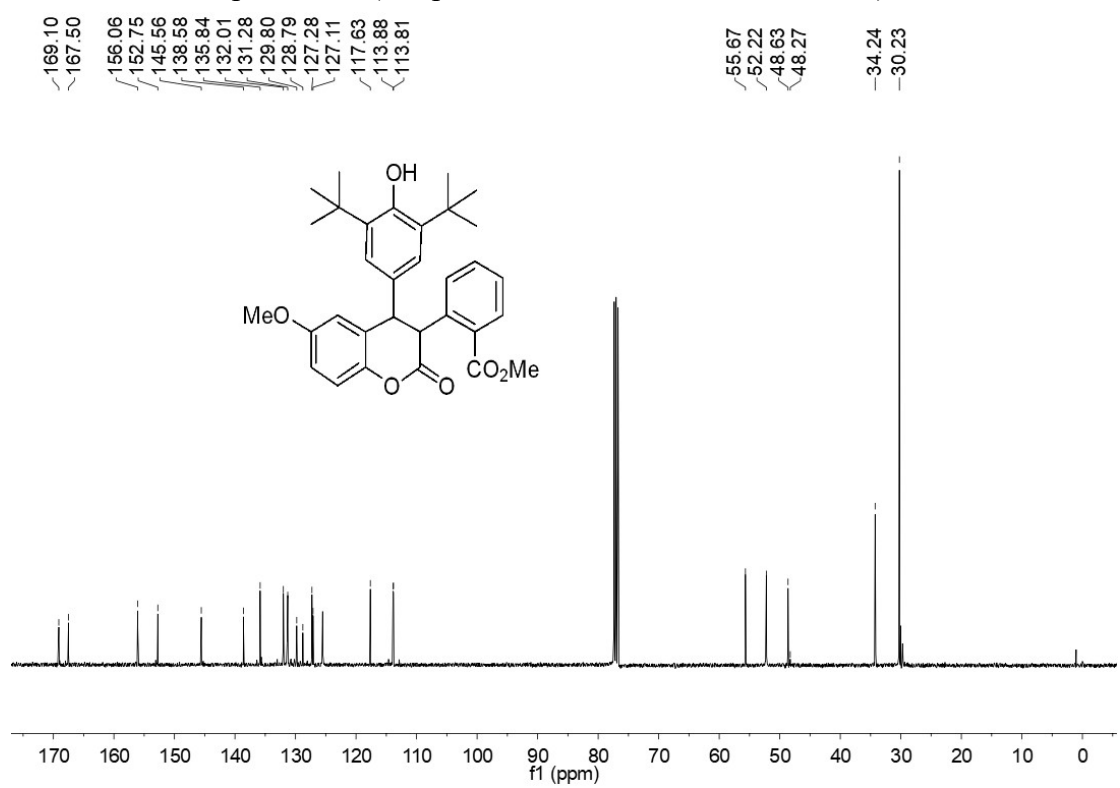

<sup>1</sup>H NMR of compound **3ga** (inseparable diastereomers with 91:9 dr)

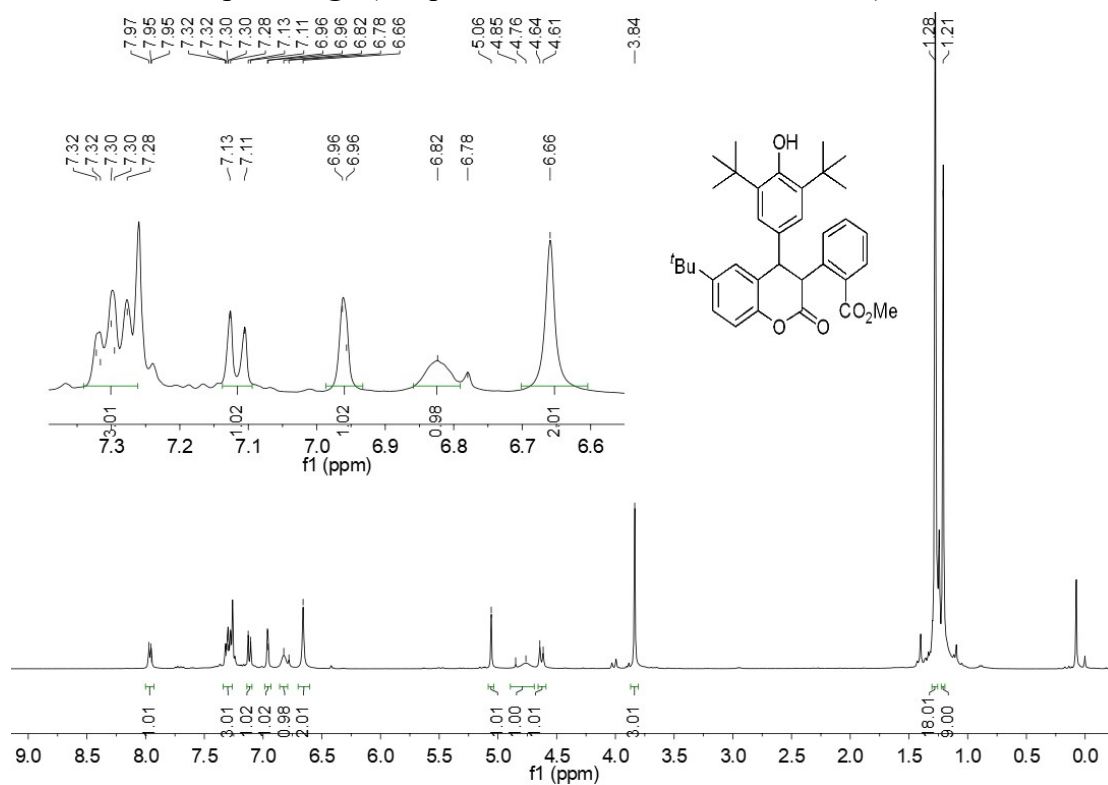

<sup>13</sup>C NMR of compound **3ga** (inseparable diastereomers with 91:9 dr)

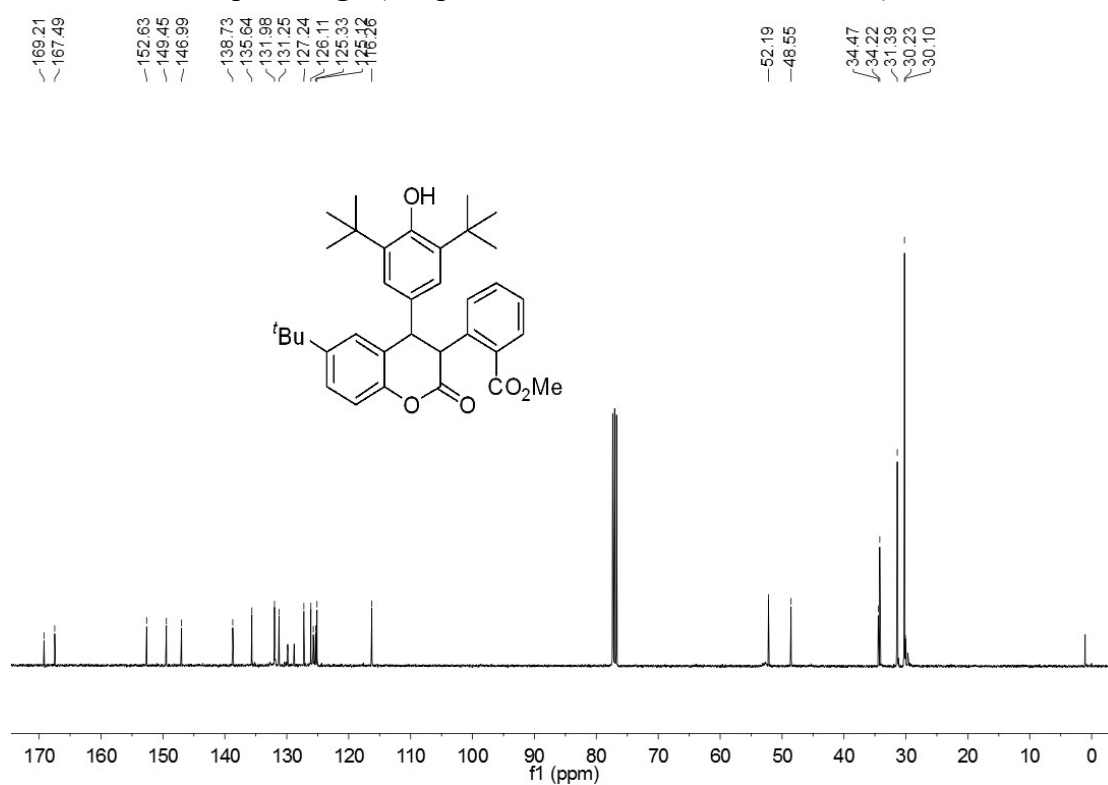



<sup>1</sup>H NMR of compound **3ha** (inseparable diastereomers with 91:9 dr)

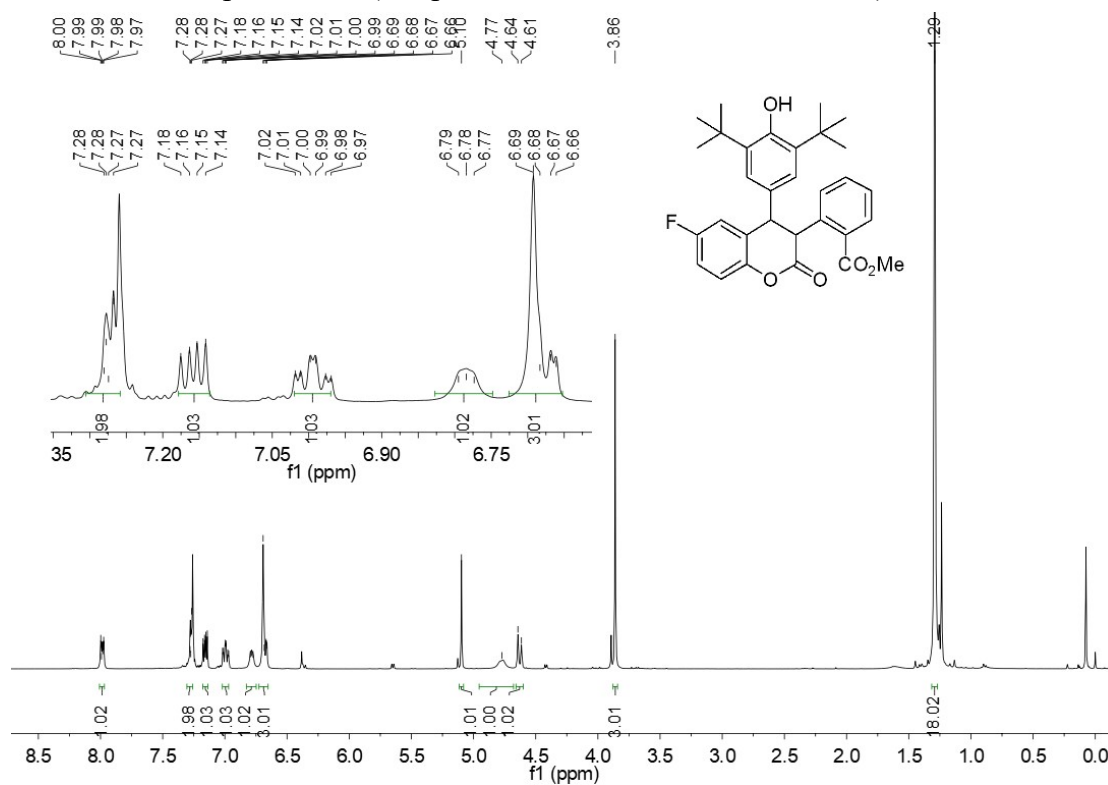

<sup>13</sup>C NMR of compound **3ha** (inseparable diastereomers with 91:9 dr)

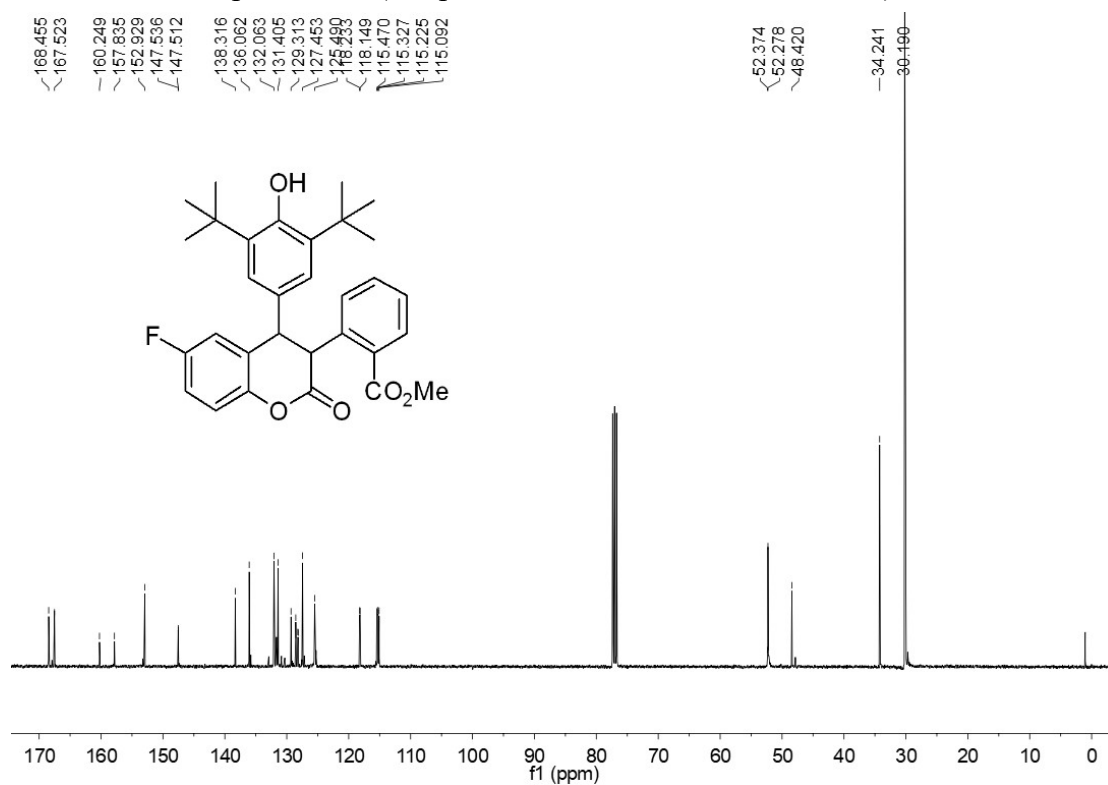

<sup>1</sup>H NMR of compound **3ia**

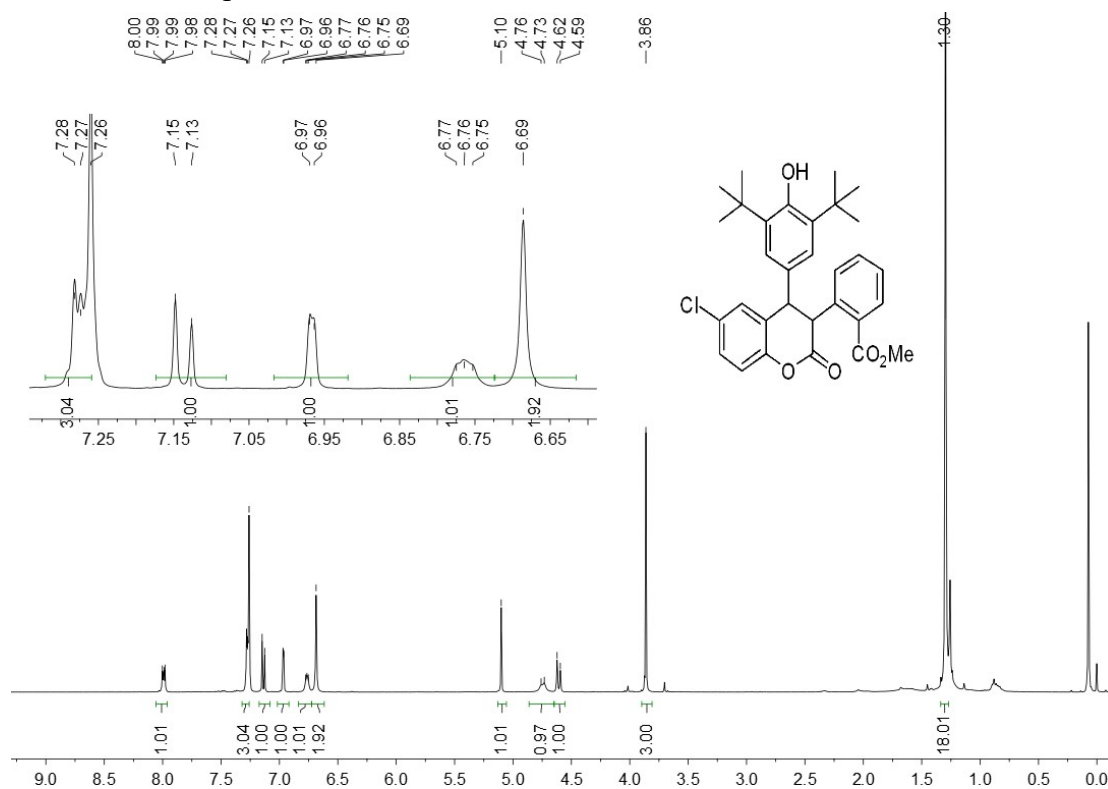

<sup>13</sup>C NMR of compound **3ia**

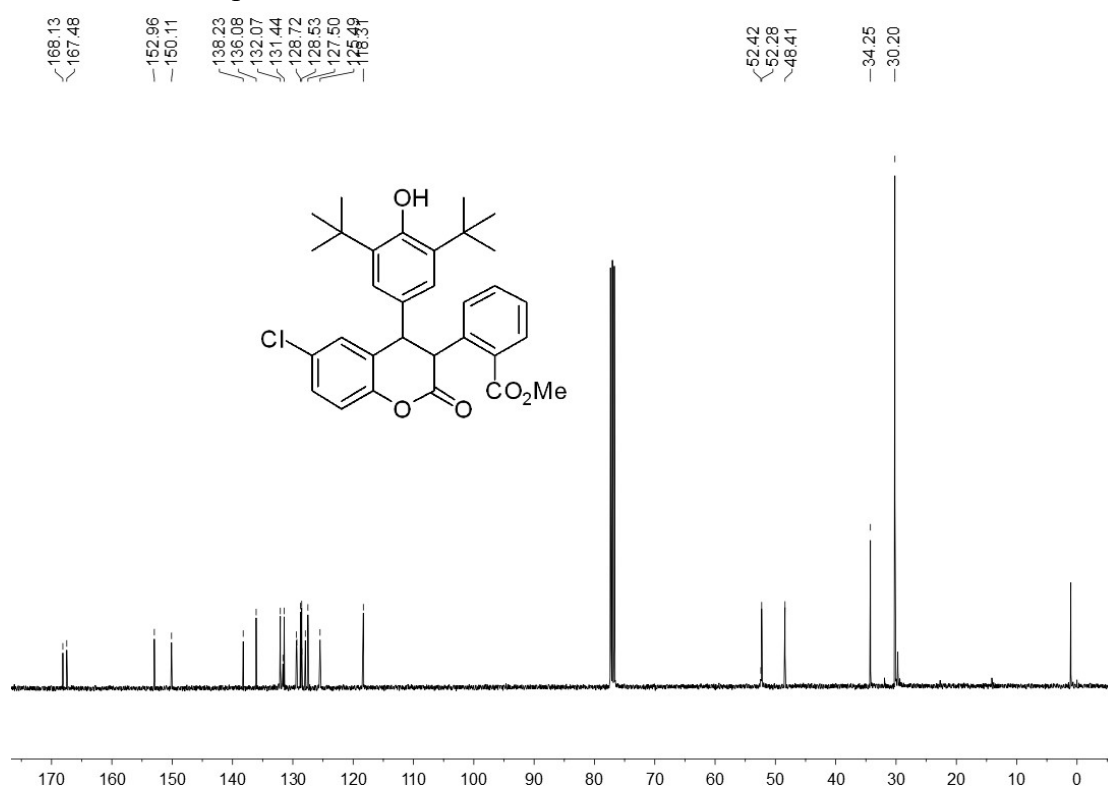

$^1\text{H}$  NMR of compound **3ja** (inseparable diastereomers with 91:9 dr)

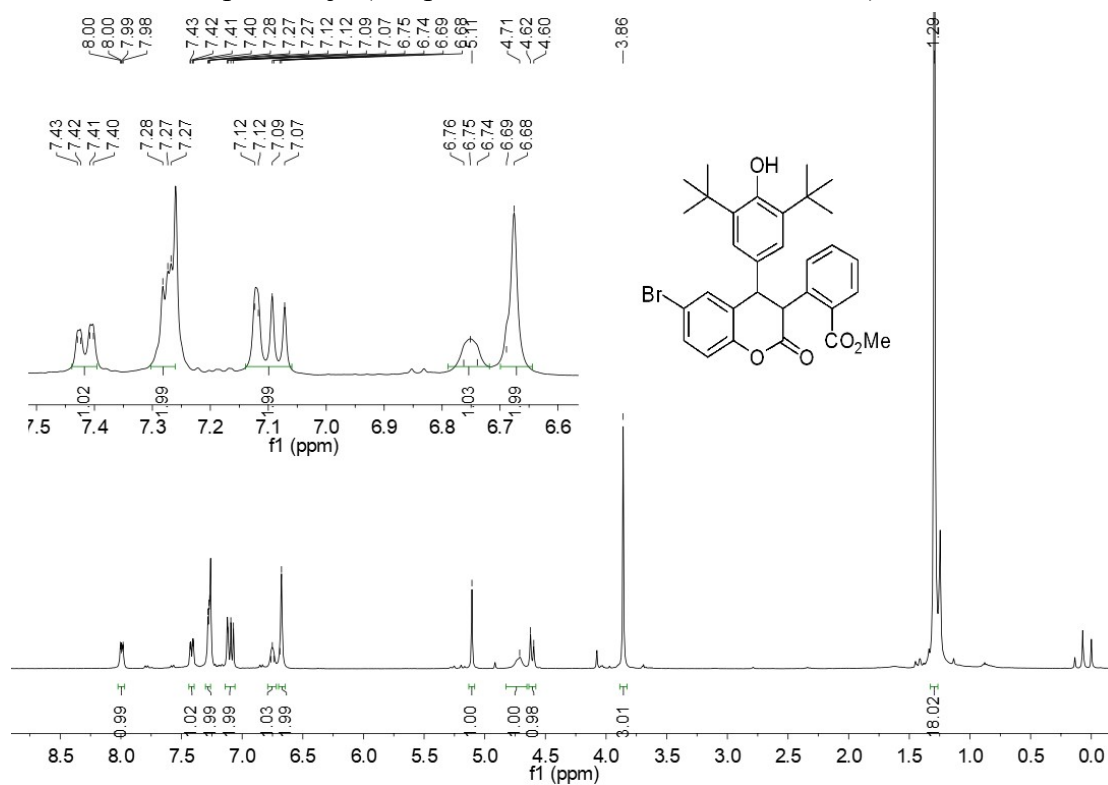

$^{13}\text{C}$  NMR of compound **3ja** (inseparable diastereomers with 91:9 dr)

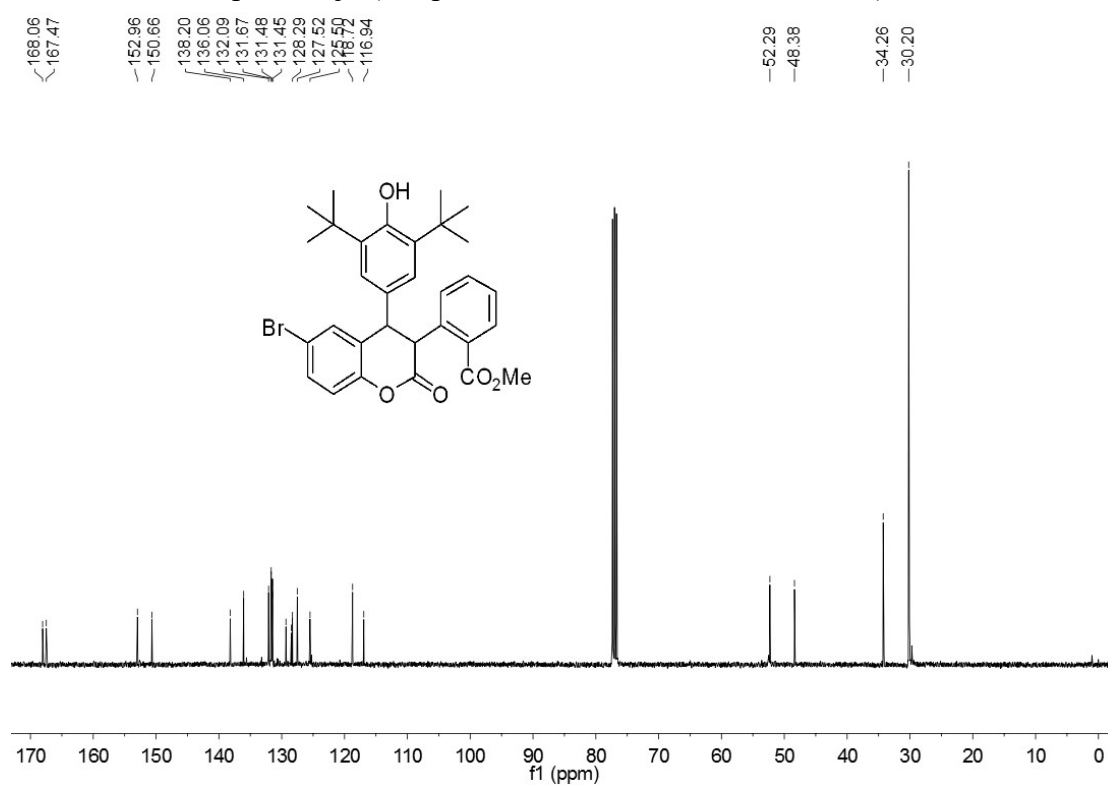

$^1\text{H}$  NMR of compound **3ab** (inseparable diastereomers with 88:12 dr)

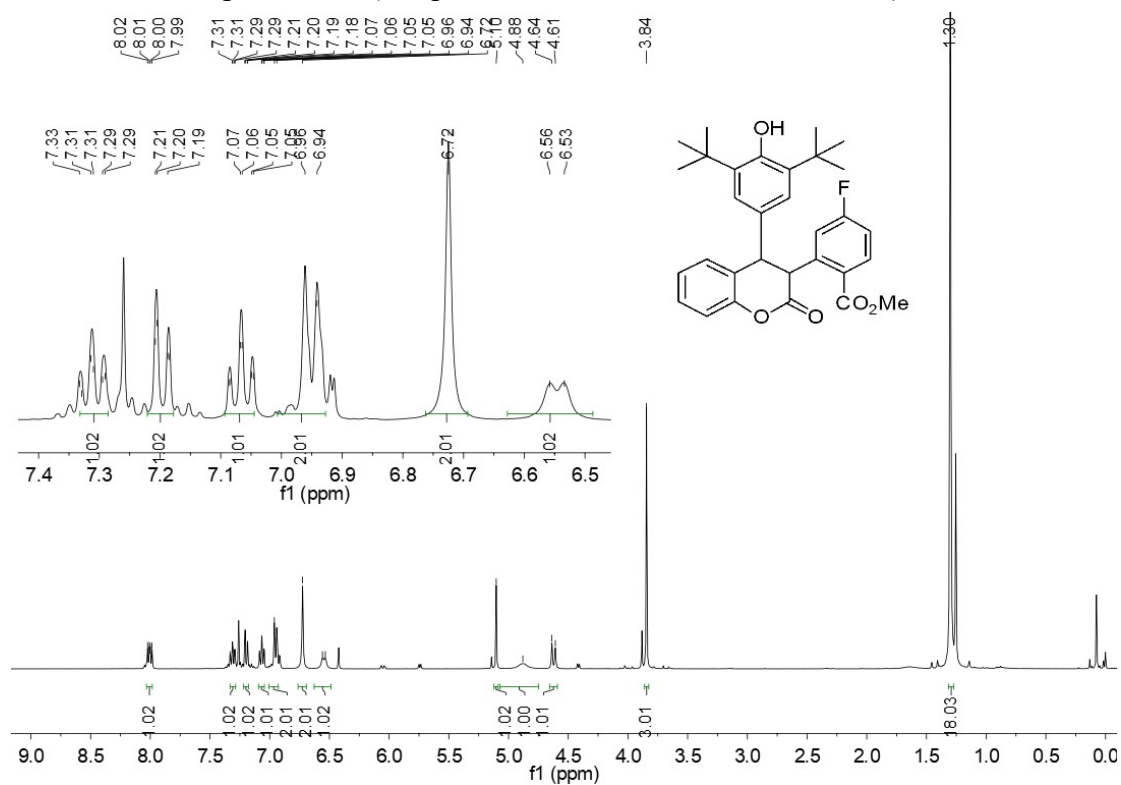

$^{13}\text{C}$  NMR of compound **3ab** (inseparable diastereomers with 91:9 dr)

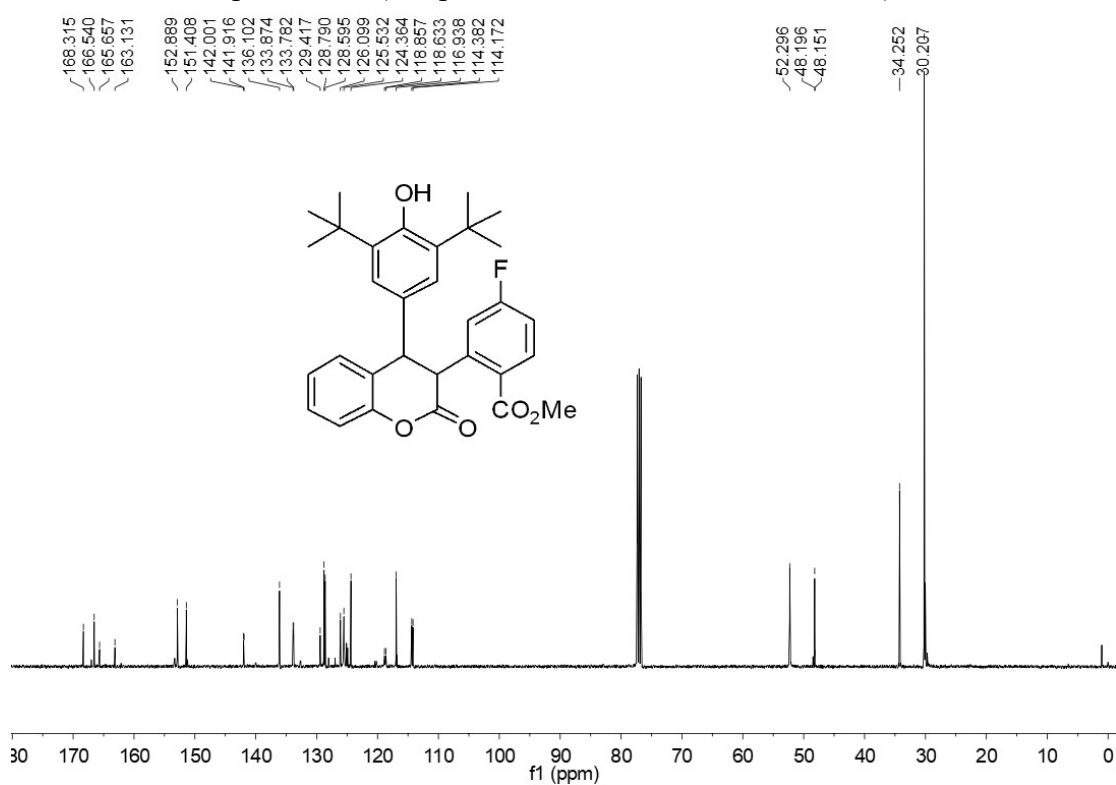

<sup>1</sup>H NMR of compound **3ac** (inseparable diastereomers with 91:9 dr)

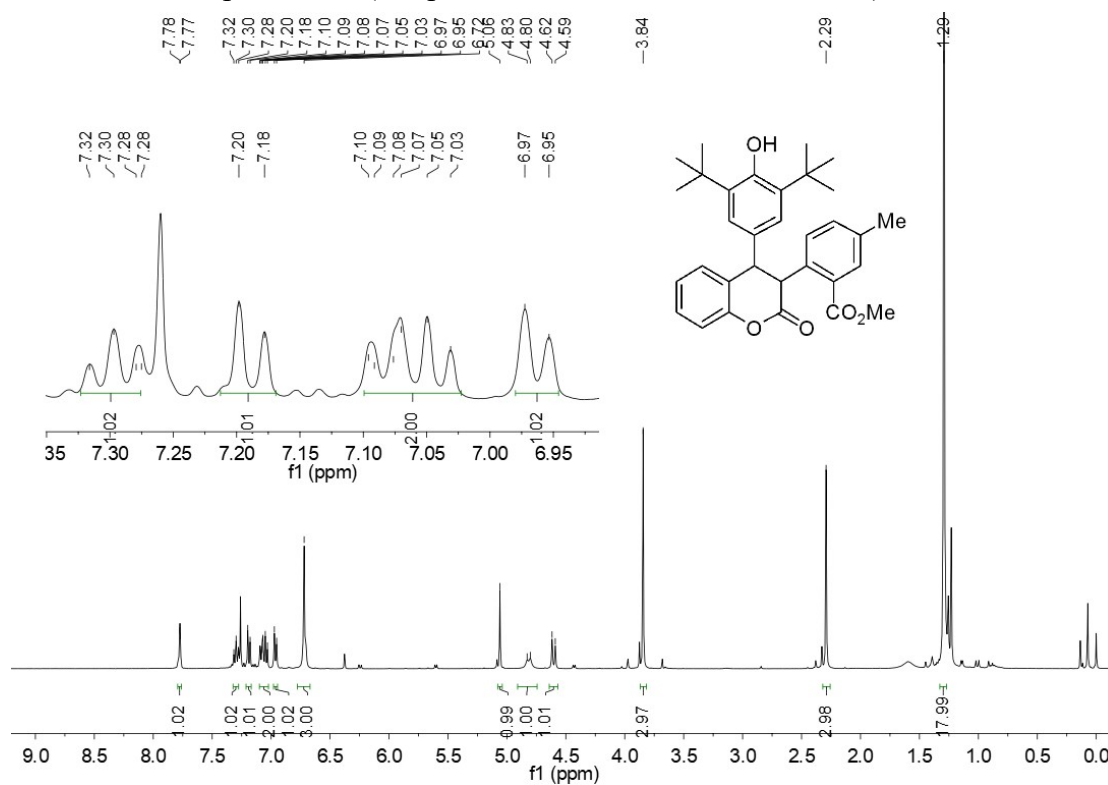

<sup>13</sup>C NMR of compound **3ac** (inseparable diastereomers with 91:9 dr)

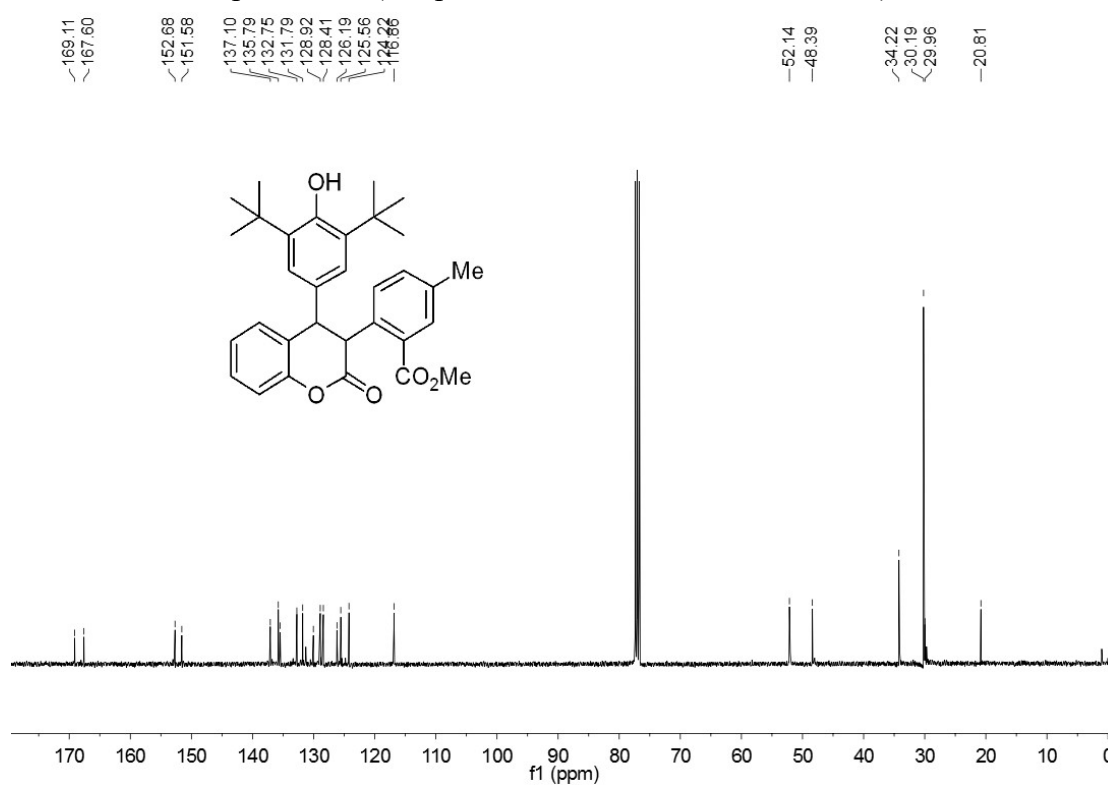

<sup>1</sup>H NMR of compound **3ad** (inseparable diastereomers with 85:15 dr)

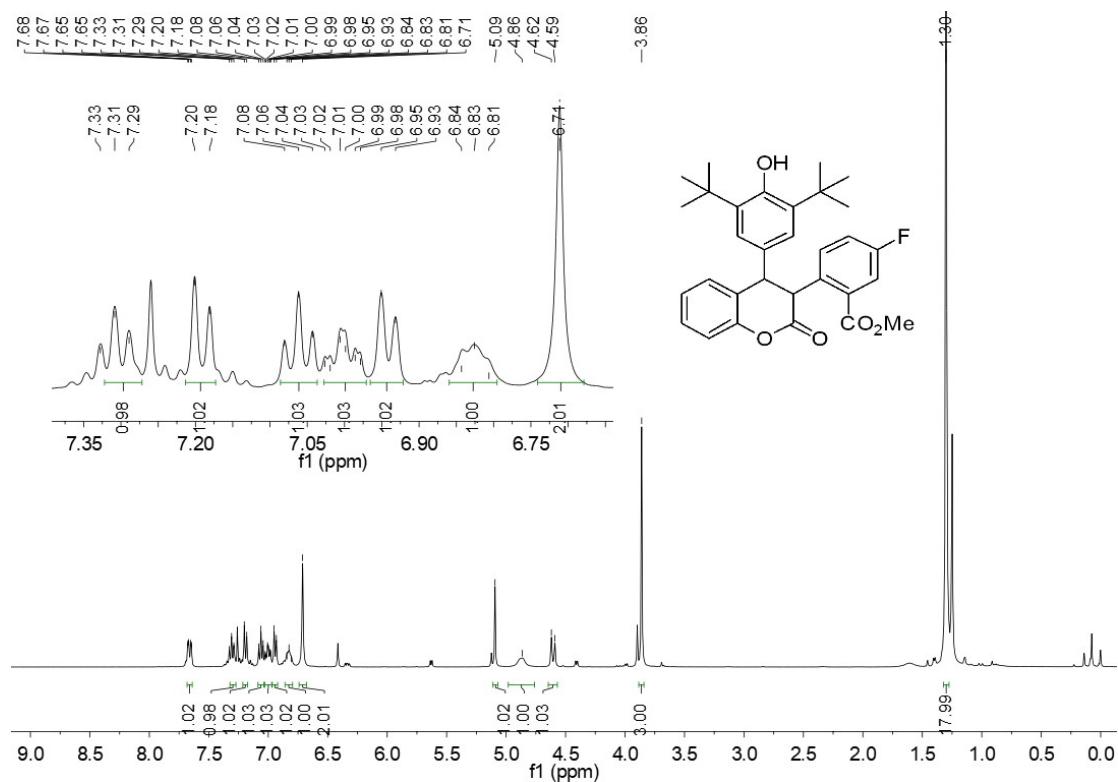

<sup>13</sup>C NMR of compound **3ad** (inseparable diastereomers with 85:15 dr)

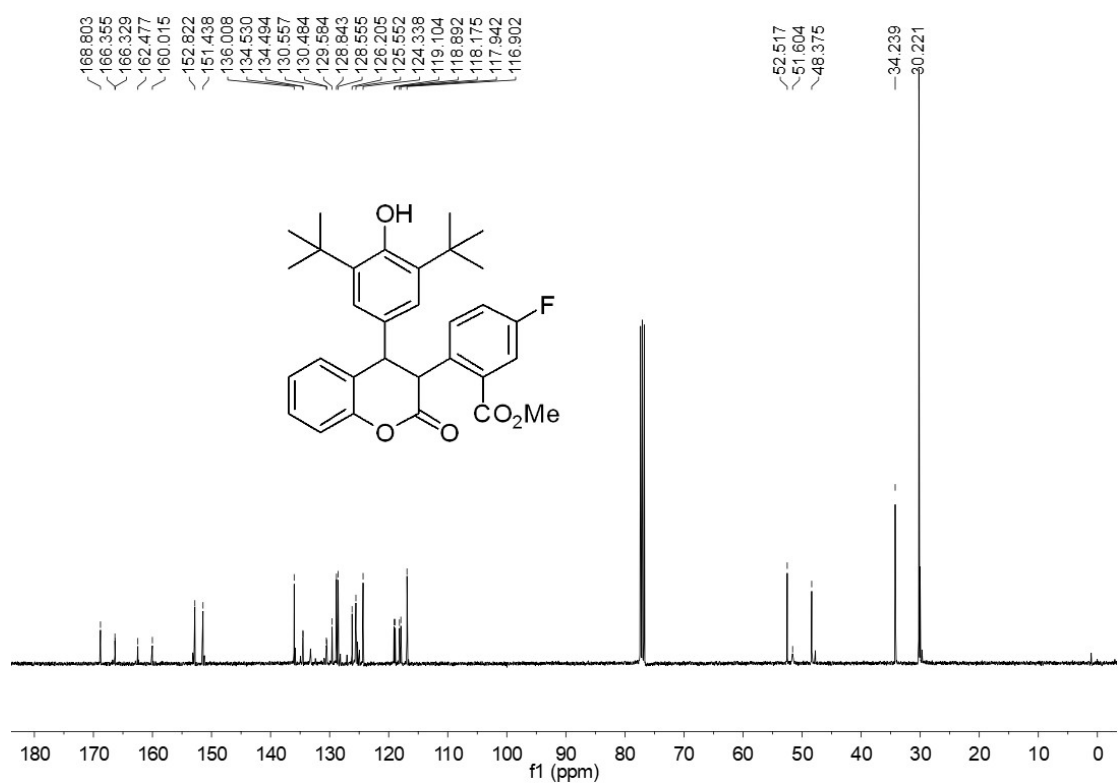

$^1\text{H}$  NMR of compound **3fb** (inseparable diastereomers with 83:17 dr)

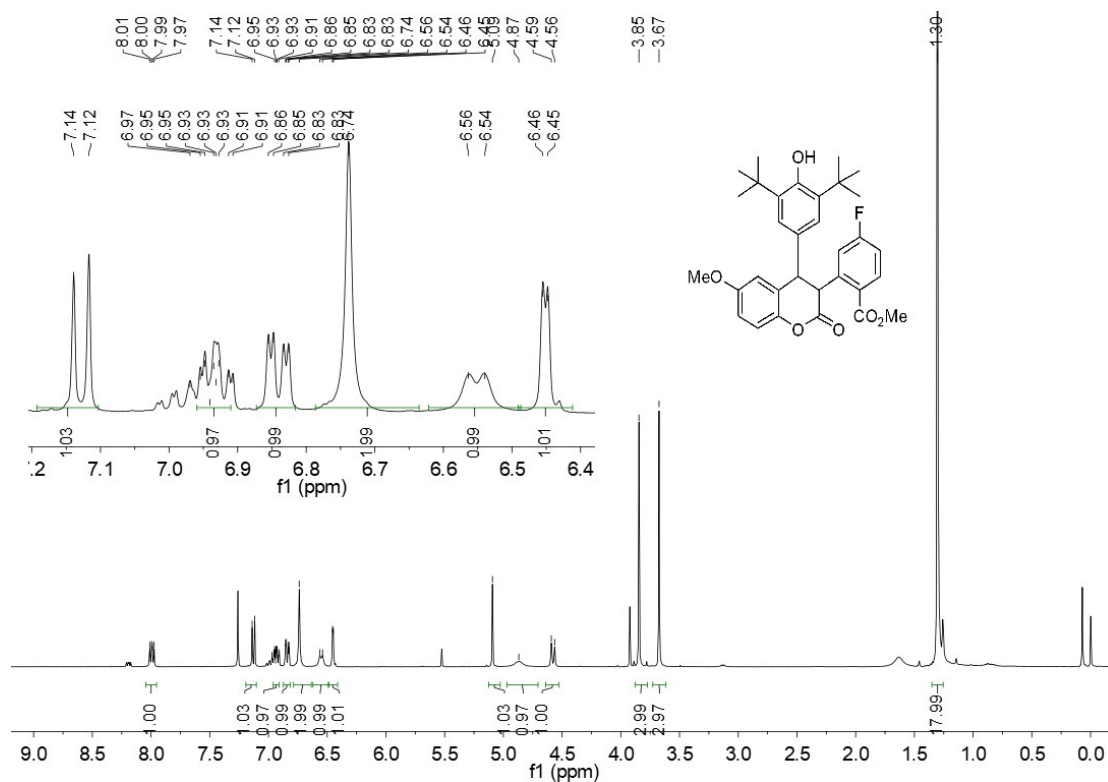

$^{13}\text{C}$  NMR of compound **3fb** (inseparable diastereomers with 83:17 dr)

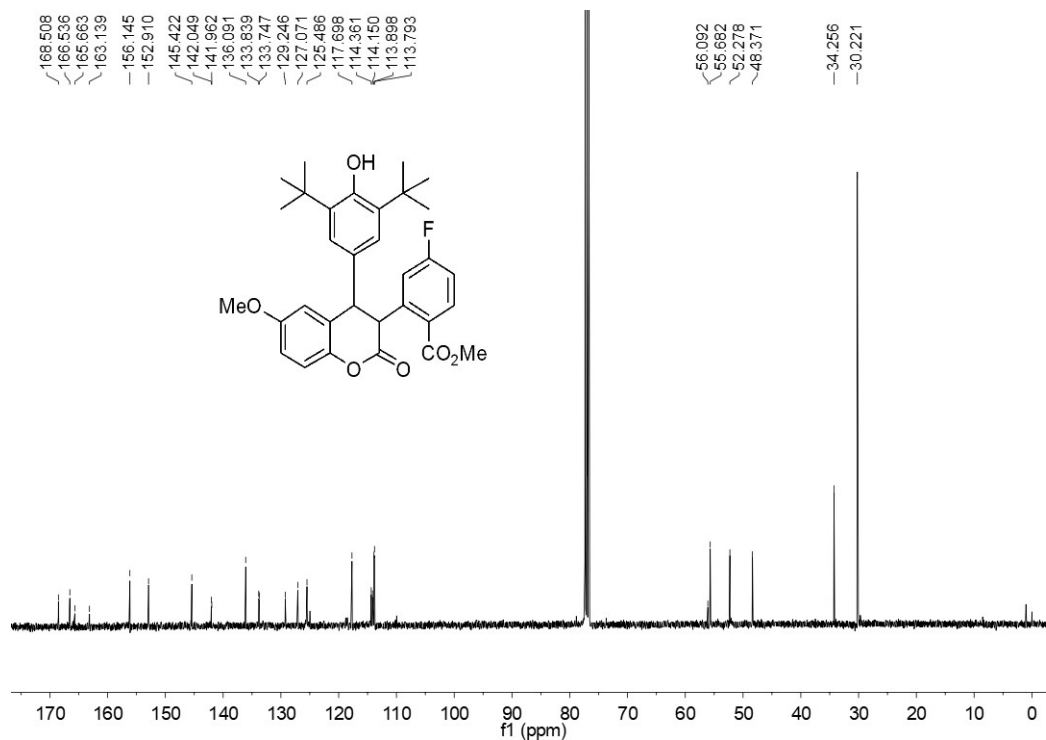

<sup>1</sup>H NMR of compound **3fc** (inseparable diastereomers with 87:13 dr)

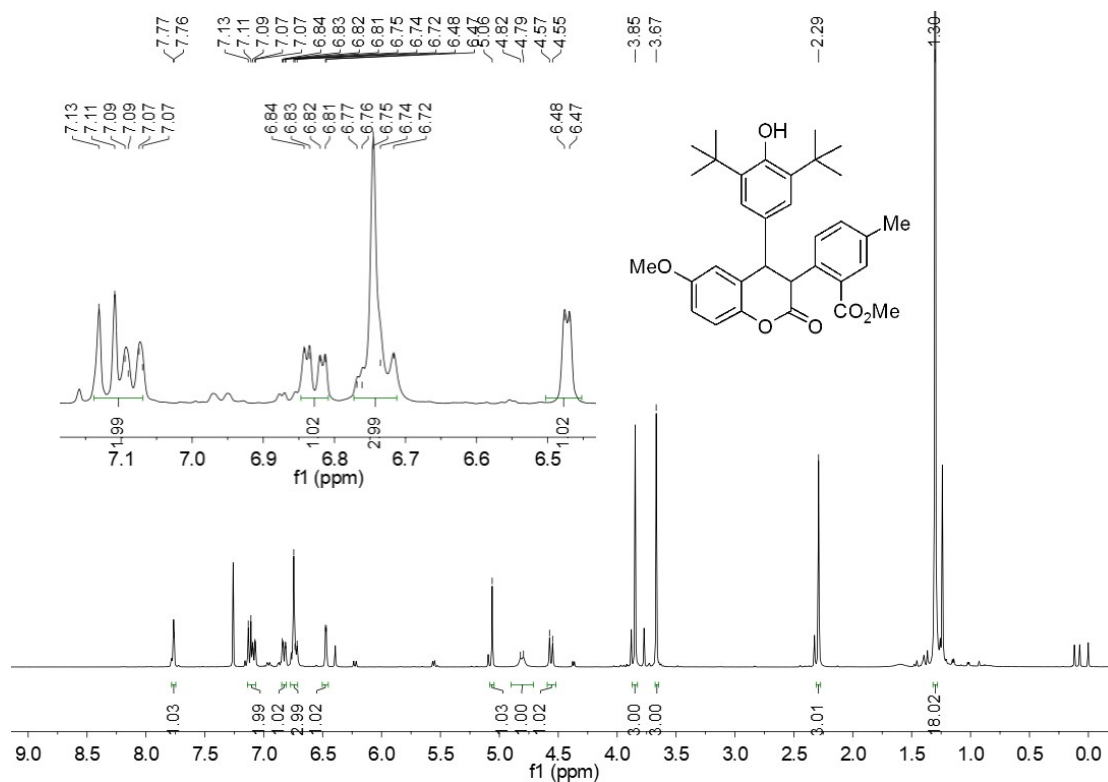

<sup>13</sup>C NMR of compound **3fc** (inseparable diastereomers with 87:13 dr)

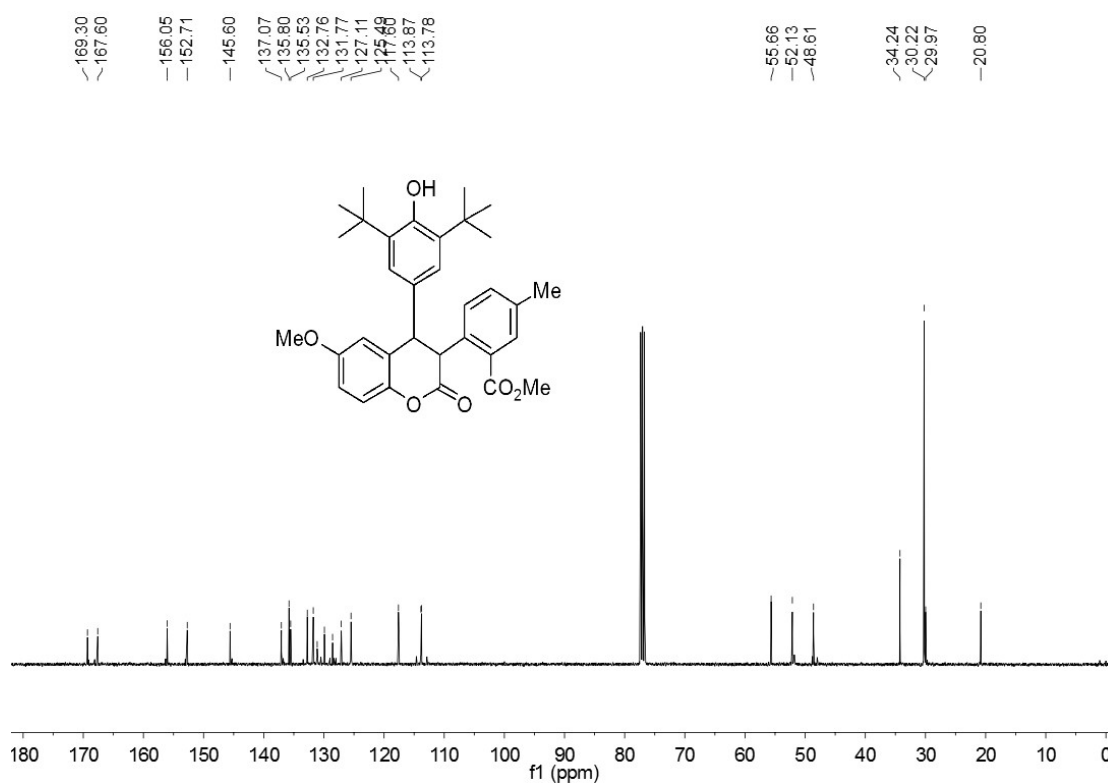



<sup>1</sup>H NMR of compound **3fd** (inseparable diastereomers with 77:23 dr)

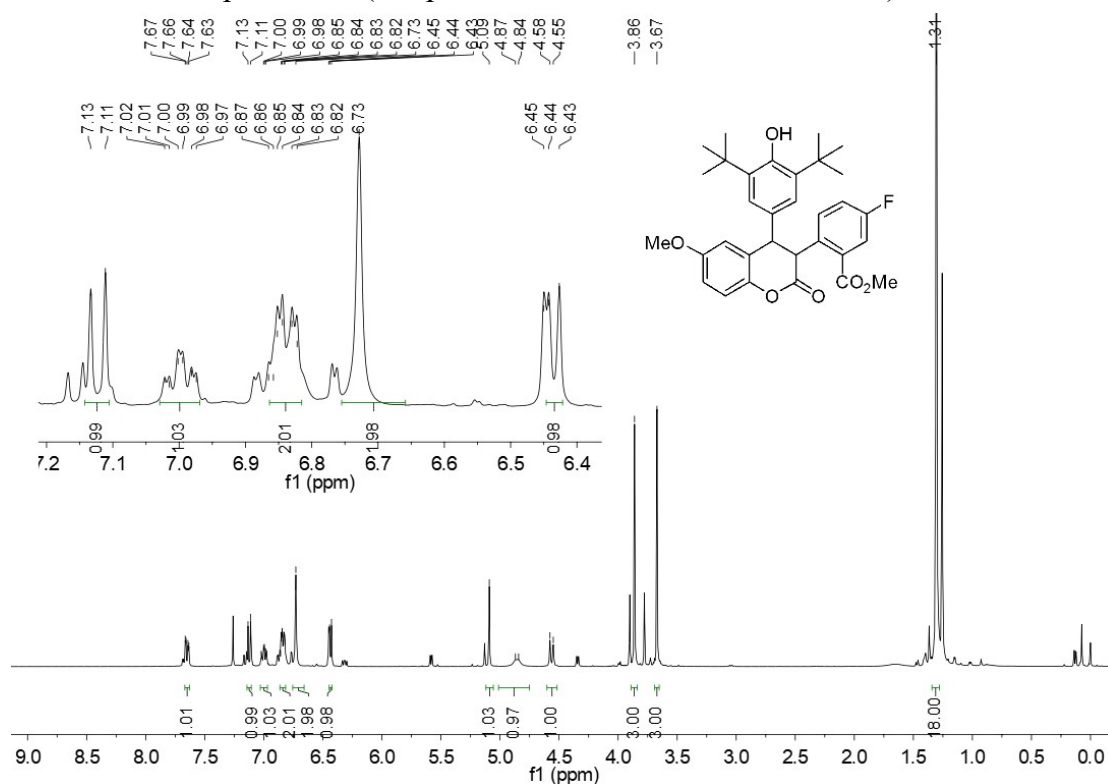

<sup>13</sup>C NMR of compound **3fd** (inseparable diastereomers with 77:23 dr)

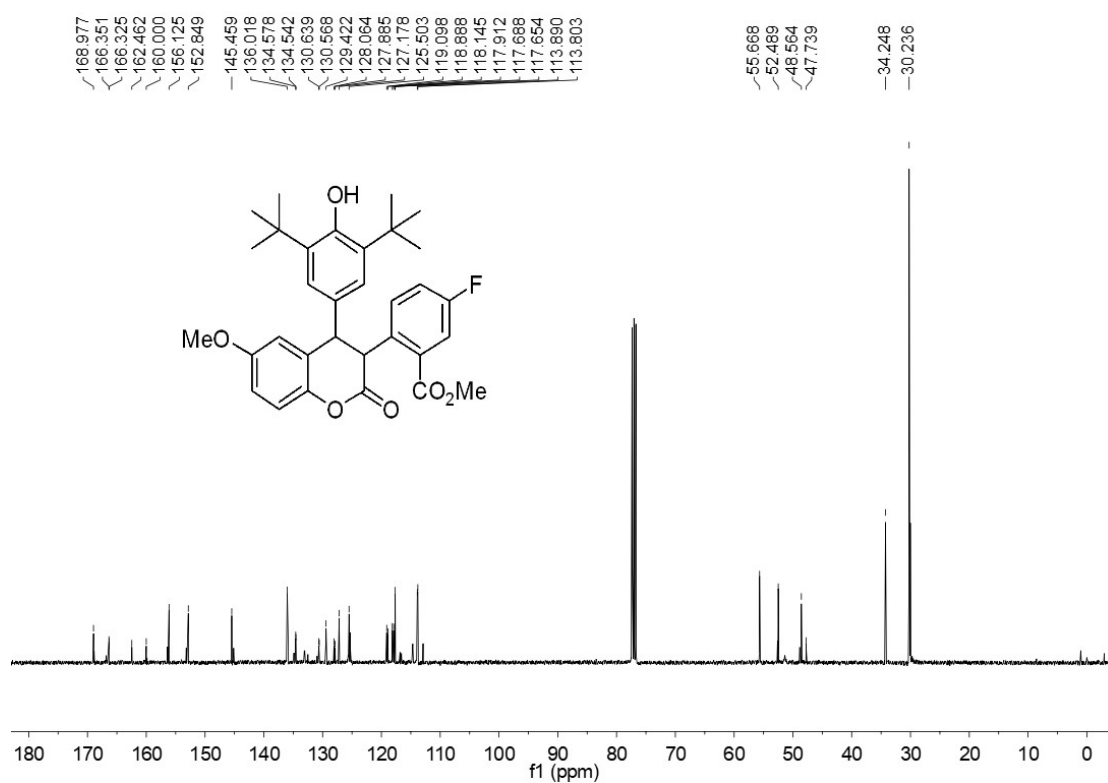

# <sup>1</sup>H NMR of compound 4

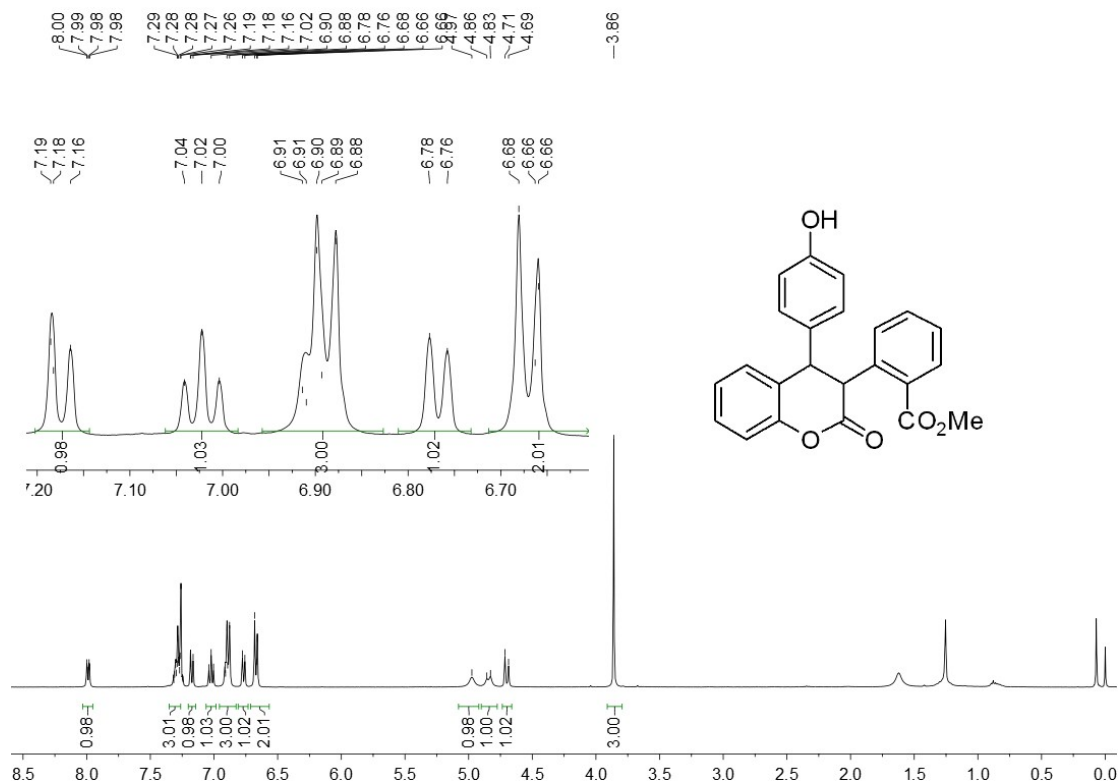

# <sup>13</sup>C NMR of compound 4

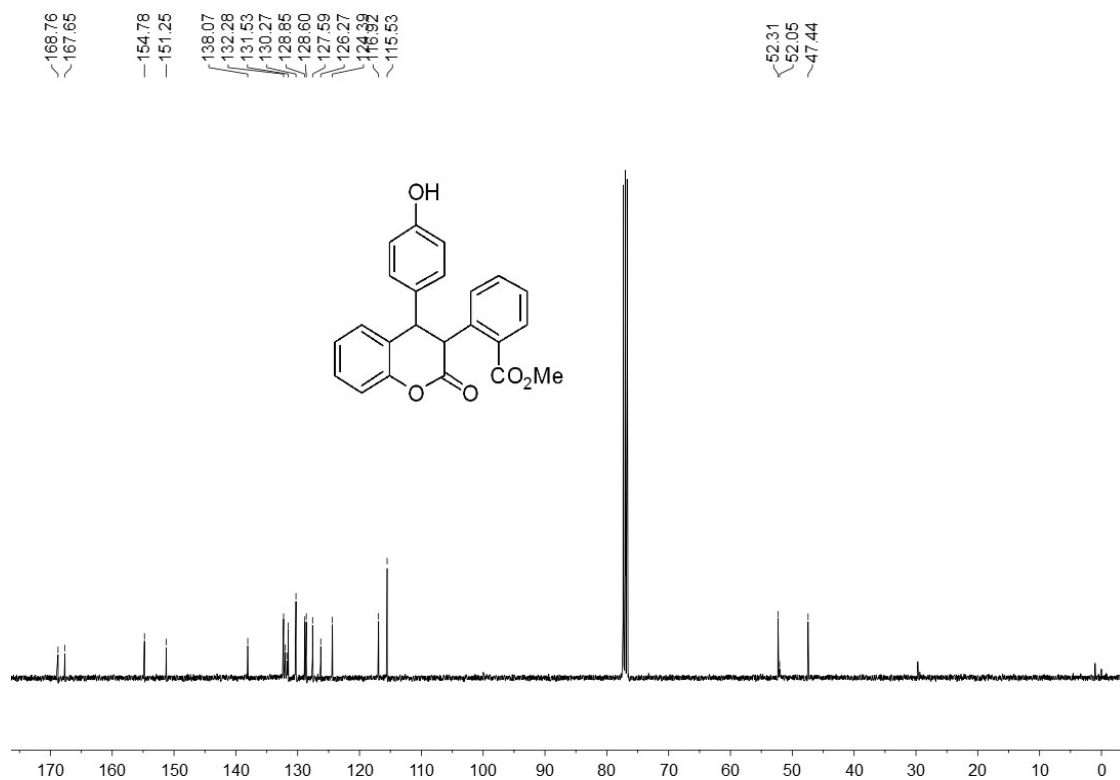

## 2. X-ray single crystal data for compound 3da

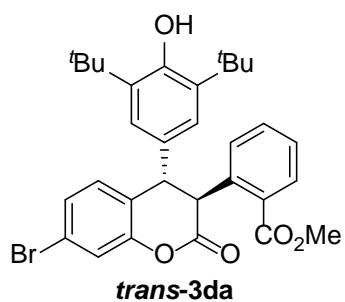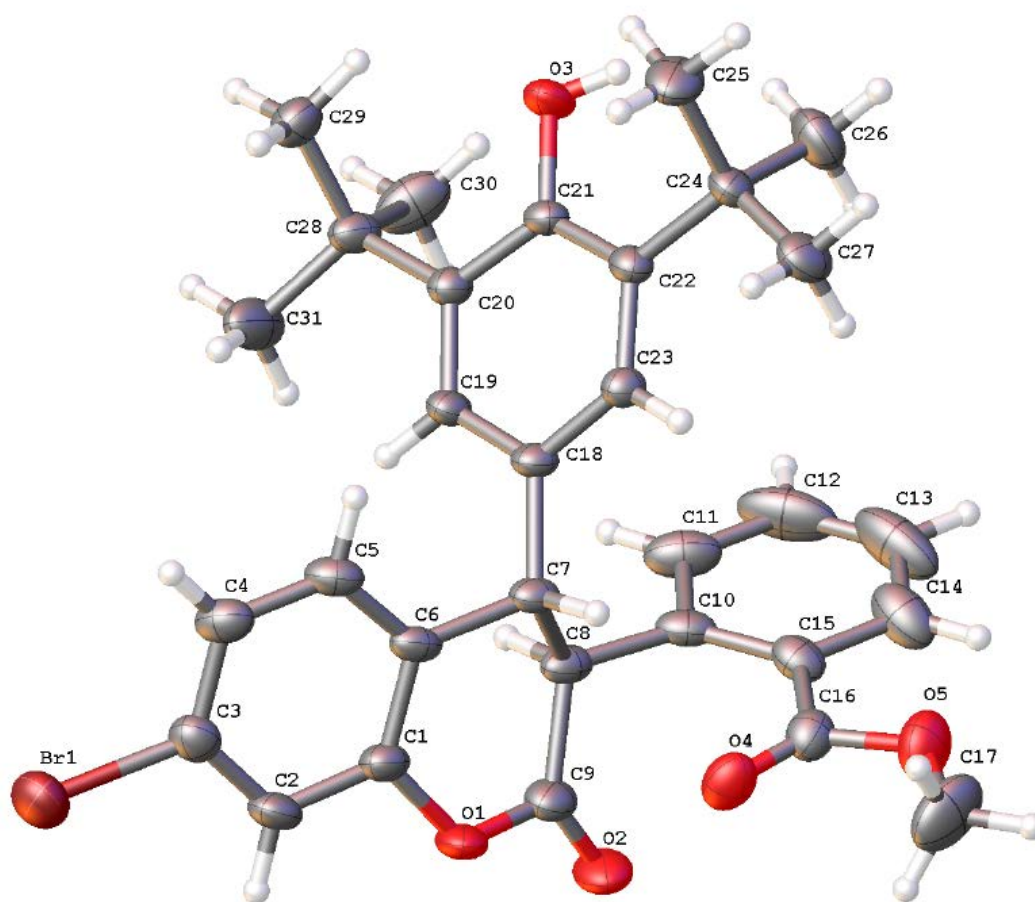

The thermal ellipsoid was drawn at the 30% probability level.

|                      |                                                   |                 |
|----------------------|---------------------------------------------------|-----------------|
| Empirical formula    | C <sub>31</sub> H <sub>33</sub> Br O <sub>5</sub> |                 |
| Formula weight       | 565.48                                            |                 |
| Temperature          | 296.15 K                                          |                 |
| Wavelength           | 0.71073 Å                                         |                 |
| Crystal system       | Triclinic                                         |                 |
| Space group          | P-1                                               |                 |
| Unit cell dimensions | a = 10.1745(11) Å                                 | α = 85.634(2)°. |
|                      | b = 11.3873(13) Å                                 | β = 82.125(2)°. |

|                                         |                                                                   |                              |
|-----------------------------------------|-------------------------------------------------------------------|------------------------------|
|                                         | $c = 12.2870(14) \text{ \AA}$                                     | $\gamma = 86.327(2)^\circ$ . |
| Volume                                  | $1404.0(3) \text{ \AA}^3$                                         |                              |
| Z                                       | 2                                                                 |                              |
| Density (calculated)                    | $1.338 \text{ Mg/m}^3$                                            |                              |
| Absorption coefficient                  | $1.501 \text{ mm}^{-1}$                                           |                              |
| F(000)                                  | 588                                                               |                              |
| Crystal size                            | $0.5 \times 0.3 \times 0.3 \text{ mm}^3$                          |                              |
| Theta range for data collection         | $2.451$ to $26.371^\circ$ .                                       |                              |
| Index ranges                            | $-9 \leq h \leq 12$ , $-12 \leq k \leq 14$ , $-15 \leq l \leq 13$ |                              |
| Reflections collected                   | 7863                                                              |                              |
| Independent reflections                 | 5602 [ $R(\text{int}) = 0.0169$ ]                                 |                              |
| Completeness to $\theta = 25.242^\circ$ | 98.1 %                                                            |                              |
| Absorption correction                   | Semi-empirical from equivalents                                   |                              |
| Max. and min. transmission              | 0.7456 and 0.6451                                                 |                              |
| Refinement method                       | Full-matrix least-squares on $F^2$                                |                              |
| Data / restraints / parameters          | 5602 / 1 / 341                                                    |                              |
| Goodness-of-fit on $F^2$                | 1.010                                                             |                              |
| Final R indices [ $I > 2\sigma(I)$ ]    | $R1 = 0.0447$ , $wR2 = 0.1012$                                    |                              |
| R indices (all data)                    | $R1 = 0.0892$ , $wR2 = 0.1172$                                    |                              |
| Extinction coefficient                  | n/a                                                               |                              |
| Largest diff. peak and hole             | $0.385$ and $-0.447 \text{ e.\AA}^{-3}$                           |                              |
